# Supplementary material for: Anesthetics significantly increase the amount of intramembrane water in lipid membranes
Source: Royal Society of Chemistry journal article supplement (doi:10.1039/d0sm01271h), 2020-01-01
Supplement: d0sm01271h1.pdf [file d0sm01271h1.pdf]

Supplementary videos S1-S4 for the article: Anesthetics significantly increase the amount of intramembrane water in lipid membranes are available for download at the following location: <https://macsphere.mcmaster.ca/handle/11375/25821>
